# Supplementary material for: CHEK1 and circCHEK1_246aa evoke chromosomal instability and induce bone lesion formation in multiple myeloma
Source: Springer Nature journal article supplement (doi:10.1186/s12943-021-01380-0), 2021-06-05
Supplement: MOESM1 [file 19232378]

## **Figure Legends**

**Supplementary Figure 1.** Elevation of CHEK1 expression is significantly associated with poor outcome in both event free survival (A) and overall survival (B) in GEP database of GMMG-HD4 cohort.

**Supplementary Figure 2.** Illustration of the annotated genomic region of CHEK1, the putative different RNA splicing forms, and the validation strategy for circular exon 1 to 7 (circCHEK1).

# ALL, EFS, MM, CHEK1 (205394\_at), maxstat cutoff = 6.4

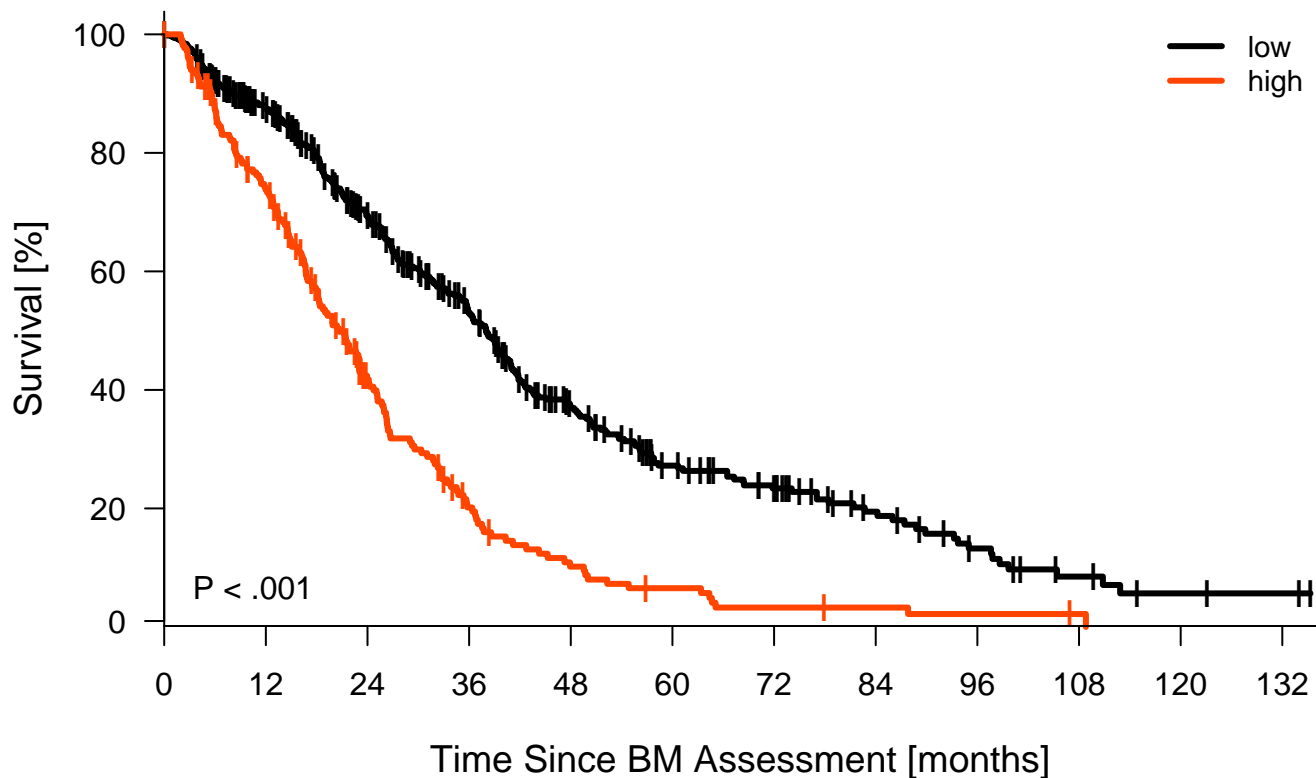

|     |     |     |     |     |    |    |    |    |   |   |   |      |
|-----|-----|-----|-----|-----|----|----|----|----|---|---|---|------|
| 502 | 386 | 266 | 175 | 102 | 62 | 45 | 27 | 15 | 7 | 3 | 2 | low  |
| 217 | 149 | 67  | 29  | 14  | 8  | 4  | 3  | 2  | 1 |   |   | high |

Supplementary Figure 1A

# ALL, OS, MM, CHEK1 (205394\_at), maxstat cutoff = 6.4

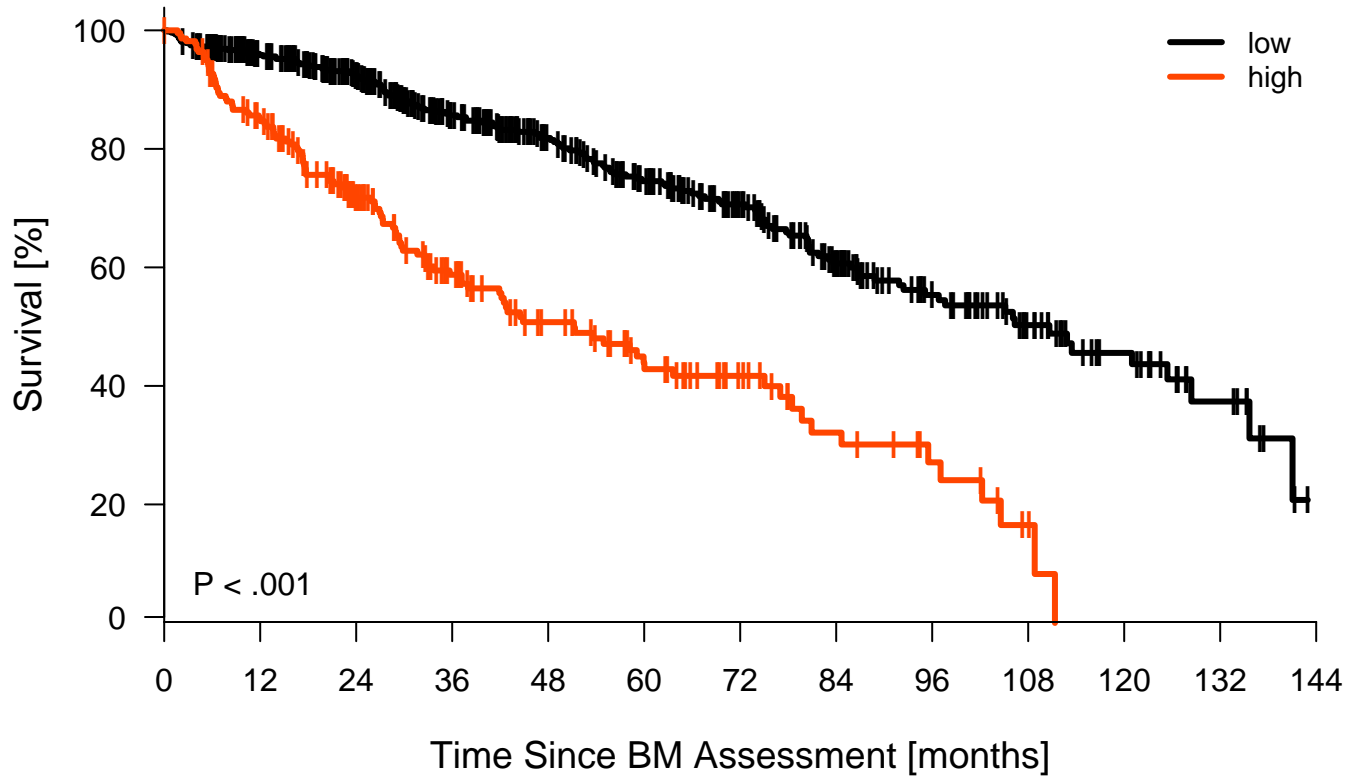

|     |     |     |     |     |     |     |    |    |    |    |    |      |
|-----|-----|-----|-----|-----|-----|-----|----|----|----|----|----|------|
| 514 | 443 | 371 | 290 | 235 | 190 | 143 | 97 | 64 | 41 | 24 | 10 | low  |
| 220 | 177 | 120 | 82  | 58  | 41  | 27  | 16 | 9  | 3  |    |    | high |

Supplementary Figure 1B

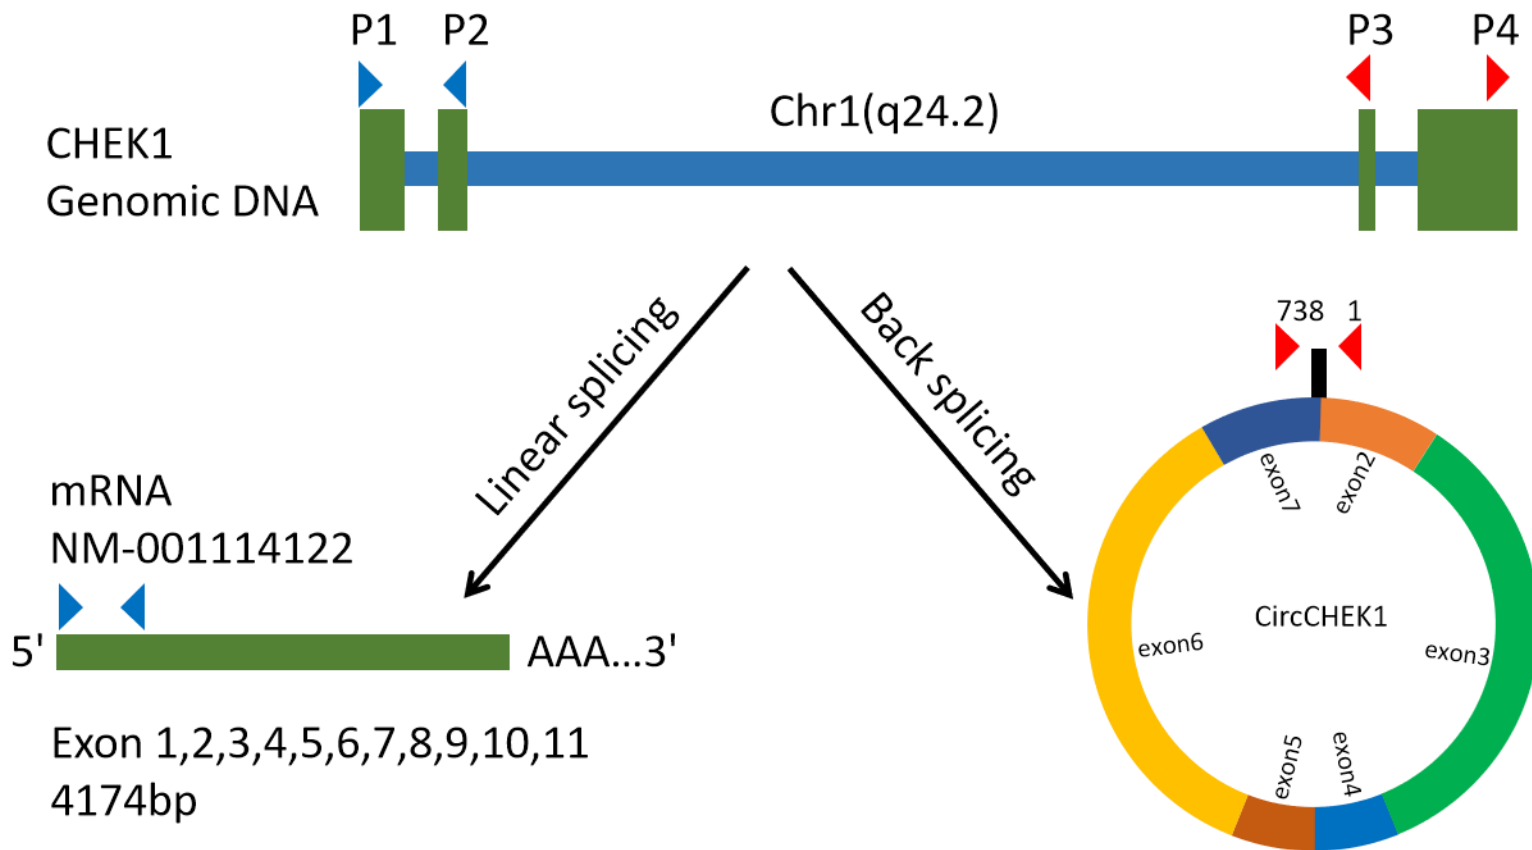

**Supplementary Figure 2**
